# Supplementary material for: Ascorbic acid and tetrahydrobiopterin potentiate the EDHF phenomenon by generating hydrogen peroxide
Source: PubMed Central journal article supplement — Cardiovasc Res. 2009 Jul 10;84(2):218–26. doi: 10.1093/cvr/cvp235 (PMC2761203; doi:10.1093/cvr/cvp235), 2009-07-10
Supplement: cvp235_1.pdf [file cvp235_1.pdf]

## SUPPLEMENTARY MATERIALS

The Amplex Red reagent (10-acetyl-3,7-dihydroxyphenoxazine; acetylresorufin) reacts with  $\text{H}_2\text{O}_2$  with a 1:1 stoichiometry in the presence of peroxidase to produce the highly fluorescent oxidation product resorufin.<sup>1</sup> It is well-recognized that  $\text{H}_2\text{O}_2$  can be reduced by AA in aqueous solution,<sup>2</sup> and there is evidence that this reaction can be accelerated by peroxidase in the presence of dyes with specific chemical structures, leading to an underestimate of  $[\text{H}_2\text{O}_2]$  assayed in the presence of AA.<sup>3</sup> However, previous studies suggest that AA does not interfere with Amplex red assay of  $\text{H}_2\text{O}_2$  generated by the combination of glucose and glucose oxidase.<sup>1</sup> Furthermore, we confirmed that assay of  $\text{H}_2\text{O}_2$  generated by the oxidation of 1 mM AA in oxygenated Holman's buffer at 37° was unaffected by 5 min incubation with ascorbate oxidase (AAO, 0.1 U/ml), which rapidly destroys AA (Figure 1A).<sup>4</sup> We also confirmed that assay of authentic  $\text{H}_2\text{O}_2$  (50  $\mu\text{M}$ ) was unaffected by addition of 200  $\mu\text{M}$   $\text{BH}_4$  or 1 mM AA after its reaction in the Amplex red system, thus demonstrating that neither agent reduced the chromophore resorufin (Figure 1B).

Experiments performed in oxygenated deionized water confirmed that 1  $\mu\text{M}$   $\text{Fe}^{3+}$  or  $\text{Cu}^{2+}$  (as chlorides) catalysed the generation of  $\text{H}_2\text{O}_2$  from 1 mM AA.  $\text{Cu}^{2+}$  was by far the more active cation in this respect, and the concentrations of  $\text{H}_2\text{O}_2$  measured after 30 min incubation with either ion closely matched published data in the literature,<sup>5</sup> thereby providing additional validation of the Amplex red assay under the experimental conditions employed (Figure 1C).

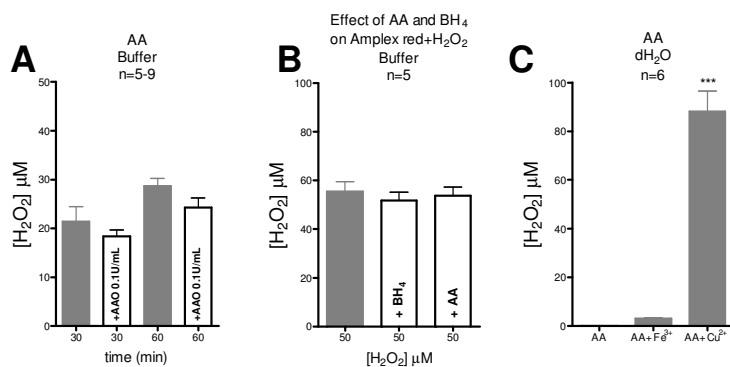

**Figure 1**

1. Maeda H, Matsu-ura S, Nishida M, Senba T, Yamauchi Y, Ohmori H. Hydrogen peroxide-induced deacetylation of acetyl resorufin as a novel indicator reaction for fluorometric detection of glucose using only glucose oxidase. *Chem Pharm Bull (Tokyo)* 2001;**49**:294-8.
2. Tóth M, Kukor Z, Valent S. Chemical stabilization of tetrahydrobiopterin by L-ascorbic acid: contribution to placental endothelial nitric oxide synthase activity. *Mol Hum Reprod* 2002;**8**:271-80.
3. Martinello F, da Silva EL. Ascorbic acid interference in the measurement of serum biochemical parameters: in vivo and in vitro studies. *Clin Biochem* 2006;**39**:396-403.
4. Kärkönen A, Fry SC. Effect of ascorbate and its oxidation products on H<sub>2</sub>O<sub>2</sub> production in cell-suspension cultures of *Picea abies* and in the absence of cells. *J Exp Bot* 2006;**57**:1633-44.
5. Buettner GR. In the absence of catalytic metals ascorbate does not autoxidize at pH 7: ascorbate as a test for catalytic metals. *J Biochem Biophys Methods* 1988;**16**:27-40.
